# Supplementary material
Source: publisher figshare collection journal article supplement (https://acs.figshare.com/ndownloader/files/3808606)
Supplement: Supplementary file 1 [file 3808606]

Support information for:

## **Can China Comply With Its 12th Five-Year Plan on Industrial Emissions**

### **Control: A Structural Decomposition Analysis**

Wei Zhang<sup>1,2</sup> Jinnan Wang<sup>\*,1,2</sup> Bing Zhang<sup>1,3</sup> Jun Bi<sup>\*,1,3</sup> Hongqiang Jiang<sup>2</sup>

1. State Key Laboratory of Pollution Control and Resource Reuse, School of the Environment, Nanjing University, Nanjing 210023, P.R. China

2. State Environmental Protection Key Laboratory of Environmental Planning and Policy Simulation, Chinese Academy for Environmental Planning, Beijing, 100012, P.R. China

3. Collaborative Innovation Center of Atmospheric Environment and Equipment Technology, Nanjing, 210000, P.R. China

The Supporting Information provides additional information about: (1) the classification of economic sectors in monetary input-output tables of China; (2) Changes of factors (such as pollution treatment facilities and its capacity, pollutants emissions, pollutants generation intensity and pollutants emission ratio) between 2005 and 2010; (3) data of outdated production facilities being shut down; (4) comparison of some economic structure data between 2005 and 2010 and prediction of GDP during 12th FYP; (5) structural decomposition results between 2005 and 2010 at the sector level; and (6) sensitivity analysis.

**Table S1 Mapping between the 41 sectors in Original MIOTs and the 26 sectors in adjusted MIOTs**

**Table S2 Projection of 39 industrial sectors in pollutants data to 23 adjusted MIOTs sectors**

**Table S3 Pollution treatment facilities and its capacity between 2005 and 2010**

**Table S4 Changes of major pollutants emissions by sectors during 11th FYP**

**Table S5 Changes of major pollutants generation intensity by sectors during 11th FYP**

**Table S6 Changes of major pollutants emission ratio by sectors during 11th FYP**

**Table S7 Outdated production facilities being shut down during 11th FYP in China**

**Table S8 Products outputs and pollution generation of heavy pollution sectors in 2007**

**Table S9 Outdated production facilities will be shut down during 12th FYP in China**

**Table S10 Prediction China's GDP value in 2014 and 2015**

**Table S11 Existing data in the first three years of 12th FYP and the gaps to achieve goals in 2015**

**Table S12 Driving factor's contributions on COD emission changes at the sector level**

**Table S13 Driving factor's contributions on NH<sub>3</sub>-N emission changes at the sector level**

**Table S14 Driving factor's contributions on SO<sub>2</sub> emission changes at the sector level (%)**

**Table S15 Driving factor's contributions on NO<sub>x</sub> emission changes at the sector level (%)**

**Table S16 Sensitivity analysis results of SDA decomposition when original emission value of four pollutants increased by 5%, 10% and 20% respectively during 11th FYP.**

**Figure S1 The percentage of three categories of final demand**

**Figure S2 The percentage of heavy-pollution industries on three categories of final demand**

**Figure S3 Total input coefficients**

**Figure S4 Sensitivity analysis results of SDA decomposition using MIOTs with different aggregation sector levels**

## 1. Reclassification of economic sectors

**Table S1 Mapping between the 41 sectors in Original MIOTs and the 26 sectors in adjusted MIOTs**

| NO. | Sectors in China MIOTs                                  | Sectors in adjusted MIOTs             | Sector abbreviations |
|-----|---------------------------------------------------------|---------------------------------------|----------------------|
| 1   | Agriculture                                             | Agriculture                           | Agriculture          |
| 2   | Coal Mining                                             | Coal Mining                           | CoalMining           |
| 3   | Petroleum and natural gas Mining                        | Petroleum and natural gas Mining      | CrudeOilGas          |
| 4   | Metal Ore Mining                                        | Metal Ore Mining                      | MetalOre             |
| 5   | Nonmetallic and other ores                              | Nonmetallic and other ores            | NonmetalOre          |
| 6   | Food and tobacco                                        | Food and tobacco                      | FoodTobacco          |
| 7   | Textiles                                                | Textiles                              | Textiles             |
| 8   | Clothing and Leather                                    | Clothing and Leather                  | ClothingLeather      |
| 9   | Wood processing and Furniture                           | Wood processing and Furniture         | WoodFurniture        |
| 10  | Papermaking and printing                                | Papermaking and printing              | PaperPrinting        |
| 11  | Petroleum processing and coking                         | Petroleum processing and coking       | PetrolCoking         |
| 12  | chemical products                                       | chemical products                     | Chemical             |
| 13  | nonmetallic mineral products                            | nonmetallic mineral products          | NonmetalProducts     |
| 14  | metal smelting and rolling                              | metal smelting and rolling            | MetalSmelt           |
| 15  | Metal Products                                          | Metal Products                        | MetalProducts        |
| 16  | General and Special purpose machinery                   | General and Special purpose machinery | GenSpecMch           |
| 17  | Transport equipment                                     | Transport equipment                   | Transportequip       |
| 18  | Electrical equipment                                    | Electrical equipment                  | ElectricalEquip      |
| 19  | Computer and electronic equipment                       | Computer and electronic equipment     | ElectronicEquip      |
| 20  | Measuring instruments                                   | Measuring instruments                 | MeasureInstru        |
| 21  | Artwork and others                                      | Artwork and others                    | ArtworkOthers        |
| 22  | electric and heat power                                 | electric and heat power               | ElectricHeatpower    |
| 23  | Fuel gas supply                                         | Fuel gas supply                       | GasSupply            |
| 24  | Water supply                                            | Water supply                          | WaterSupply          |
| 25  | Construction                                            | Construction                          | Construction         |
| 26  | Transport and Storage                                   | Services                              | Services             |
| 27  | Post                                                    |                                       |                      |
| 28  | Information and data processing                         |                                       |                      |
| 29  | Wholesale and Retail                                    |                                       |                      |
| 30  | Accommodation and Catering                              |                                       |                      |
| 31  | Financial Intermediation                                |                                       |                      |
| 32  | Real Estate                                             |                                       |                      |
| 33  | Leasing and Business                                    |                                       |                      |
| 34  | Research and Experimental Development                   |                                       |                      |
| 35  | Comprehensive Technical Services                        |                                       |                      |
| 36  | Management of Water , Environment and Public Facilities |                                       |                      |
| 37  | Services to Households and Other Services               |                                       |                      |
| 38  | Education                                               |                                       |                      |
| 39  | Health , Social Security and Social Welfare             |                                       |                      |
| 40  | Culture, Sports and Entertainment                       |                                       |                      |
| 41  | Public Management and Social Organization               |                                       |                      |

**Table S2 Projection of 39 industrial sectors in pollutants data to 23 adjusted MIOTs sectors**

| <b>NO.</b> | <b>Sector in industrial pollutants data</b> | <b>Merged sectors in adjusted MIOTs</b> |
|------------|---------------------------------------------|-----------------------------------------|
| 1          | Coal Mining                                 | Coal Mining                             |
| 2          | Petroleum and natural gas Mining            | Petroleum and natural gas Mining        |
| 3          | Ferrous metal ores Mining                   | Metal Ore Mining                        |
| 4          | Nonferrous metal ores Mining                |                                         |
| 5          | Nonmetallic ores Mining                     | Nonmetallic and other ores              |
| 6          | Other ores Mining                           |                                         |
| 7          | Food processing                             | Food and tobacco products               |
| 8          | Food production                             |                                         |
| 9          | Beverages                                   |                                         |
| 10         | Tobacco                                     | Textiles                                |
| 11         | Textiles                                    |                                         |
| 12         | Clothes                                     | Clothing and Leather                    |
| 13         | Leather, fur and feather                    |                                         |
| 14         | Wood processing                             | Wood processing and Furniture           |
| 15         | Furniture                                   |                                         |
| 16         | Papermaking                                 | Papermaking and printing                |
| 17         | Printing and recording media                |                                         |
| 18         | Cultural articles                           | Petroleum processing and coking         |
| 19         | Petroleum processing and coking             |                                         |
| 20         | Raw chemical materials                      | Chemical products                       |
| 21         | Medicines                                   |                                         |
| 22         | Chemical fibers                             |                                         |
| 23         | Rubber                                      |                                         |
| 24         | Plastics                                    | Nonmetallic mineral products            |
| 25         | Nonmetallic mineral products                |                                         |
| 26         | Ferrous metals smelting and rolling         | Metal smelting and rolling              |
| 27         | Nonferrous metals smelting and rolling      |                                         |
| 28         | Metal products                              | Metal products                          |
| 29         | General purpose machinery                   |                                         |
| 30         | Special purpose machinery                   | General and Special purpose machinery   |
| 31         | Transport equipment                         |                                         |
| 32         | Electrical equipment                        | Electrical equipment                    |
| 33         | Computer and electronic equipment           |                                         |
| 34         | Measuring instruments                       | Measuring instruments                   |
| 35         | Artwork and others                          |                                         |
| 36         | Waste recycling                             | Artwork and others                      |
| 37         | electric and heat power                     |                                         |
| 38         | Fuel gas supply                             | Fuel gas supply                         |
| 39         | Water supply                                |                                         |
| 40         | Other industries                            | (deleted)                               |

## 2. Changes of factors between 2005 and 2010

**Table S3 Pollution treatment facilities and its capacity between 2005 and 2010**

|                                                             | unit                     | 2005 | 2006 | 2007 | 2008 | 2009  | 2010  |
|-------------------------------------------------------------|--------------------------|------|------|------|------|-------|-------|
| Number of treatment facilities for industrial waste water   | 10 <sup>4</sup> set      | 6.92 | 7.58 | 7.82 | 7.87 | 7.70  | 8.03  |
| Capacity of treatment facilities for industrial waste water | 10 <sup>8</sup> tons/day | 1.63 | 1.96 | 2.21 | 2.29 | 2.27  | 2.48  |
| Treatment plants for urban waste water                      | unit                     | 764  | 939  | 1258 | 1692 | 2192  | 2881  |
| Treatment capacity for urban waste water                    | 10 <sup>4</sup> tons/day | 5220 | 6370 | 7579 | 9079 | 10477 | 12331 |
| Number of industrial desulfurization facilities             | 10 <sup>4</sup> sets     | 2.26 | 2.45 | 2.47 | 2.73 | 2.70  | 2.66  |
| Capacity of industrial desulfurization facilities           | 10 <sup>4</sup> ton/h    | 1.29 | 1.61 | 2.44 | 2.40 | 2.54  | 3.14  |
| Capacity of thermal power                                   | 10 <sup>8</sup> kwh      | 3.91 | 4.84 | 5.56 | 6.03 | 6.51  | 7.10  |
| Desulfurized capacity of thermal power                      | 10 <sup>8</sup> kwh      | 0.53 | 1.46 | 2.66 | 3.63 | 4.61  | 5.78  |

Data sources: *Annual Statistic Report on Environment in China 2010*<sup>1</sup>.

**Table S4 Changes of major pollutants emissions by sectors during 11th FYP (unit: 1000 tons)**

| Sectors           | COD           |               |                | NH <sub>3</sub> -N |              |               | SO <sub>2</sub> |                |                | NO <sub>x</sub> |                |               |
|-------------------|---------------|---------------|----------------|--------------------|--------------|---------------|-----------------|----------------|----------------|-----------------|----------------|---------------|
|                   | 2005          | 2010          | changes        | 2005               | 2010         | changes       | 2005            | 2010           | changes        | 2006            | 2010           | changes       |
| CoalMining        | 57.4          | 100.2         | 42.8           | 2.2                | 5.7          | 3.5           | 210.4           | 160.3          | -50.2          | 87.1            | 73.9           | -13.1         |
| CrudeOilGas       | 16.7          | 32.6          | 15.9           | 2.4                | 1.0          | -1.4          | 32.2            | 35.6           | 3.4            | 29.5            | 27.2           | -2.4          |
| MetalOre          | 75.2          | 42.2          | -33.0          | 0.9                | 3.4          | 2.5           | 110.2           | 164.0          | 53.8           | 25.7            | 22.2           | -3.6          |
| NonmetalOre       | 20.7          | 8.7           | -12.0          | 1.6                | 0.4          | -1.2          | 59.3            | 42.7           | -16.6          | 44.2            | 19.1           | -25.1         |
| FoodTobacco       | 1020          | 843.0         | -177.1         | 82.8               | 38.1         | -44.8         | 369.1           | 406.8          | 37.6           | 210.5           | 246.4          | 35.9          |
| Textiles          | 298.6         | 300.6         | 2.0            | 16.6               | 17.4         | 0.8           | 296.2           | 247.2          | -49.0          | 152.4           | 129.3          | -23.1         |
| ClothingLeather   | 21.4          | 77.5          | 56.1           | 1.5                | 5.8          | 4.3           | 36.6            | 25.2           | -11.3          | 19.1            | 14.3           | -4.8          |
| WoodFurniture     | 28.8          | 15.3          | -13.5          | 2.2                | 0.6          | -1.6          | 51.6            | 34.8           | -16.8          | 17.9            | 17.1           | -0.7          |
| PaperPrinting     | 1602.6        | 954.7         | -647.9         | 42.5               | 25.2         | -17.3         | 436.4           | 512.3          | 75.9           | 233.7           | 238.4          | 4.7           |
| PetrolCoking      | 83.3          | 81.7          | -1.6           | 16.3               | 7.7          | -8.6          | 708.5           | 635.3          | -73.2          | 218.8           | 347.2          | 128.4         |
| Chemical          | 810.3         | 695.6         | -114.7         | 234.1              | 87.8         | -146.3        | 1404.4          | 1295.2         | -109.1         | 732.3           | 728.7          | -3.6          |
| NonmetalProducts  | 52.8          | 31.2          | -21.7          | 1.5                | 2.0          | 0.6           | 1783.6          | 1686.2         | -97.5          | 836.0           | 1593.8         | 757.8         |
| MetalSmelt        | 210.6         | 136.1         | -74.4          | 31.3               | 15.3         | -16.0         | 2129.4          | 2569.8         | 440.5          | 880.1           | 1157.6         | 277.5         |
| MetalProducts     | 20.2          | 25.3          | 5.1            | 0.8                | 1.9          | 1.1           | 25.5            | 35.0           | 9.5            | 16.6            | 18.2           | 1.6           |
| GenSpecIMch       | 33.0          | 25.2          | -7.9           | 3.3                | 1.9          | -1.4          | 88.2            | 89.6           | 1.4            | 39.7            | 68.9           | 29.2          |
| Transportequip    | 38.1          | 53.8          | 15.7           | 2.0                | 2.6          | 0.6           | 41.0            | 33.9           | -7.1           | 54.1            | 37.0           | -17.1         |
| ElectricalEquip   | 9.6           | 12.8          | 3.2            | 0.3                | 0.7          | 0.4           | 27.2            | 13.5           | -13.7          | 6.8             | 7.8            | 1.0           |
| ElectronicEquip   | 16.7          | 28.6          | 11.9           | 1.0                | 2.7          | 1.7           | 17.0            | 6.5            | -10.5          | 11.7            | 8.5            | -3.1          |
| MeasureInstru     | 9.4           | 4.0           | -5.3           | 0.6                | 0.4          | -0.2          | 13.0            | 1.4            | -11.6          | 12.1            | 1.0            | -11.1         |
| ArtworkOthers     | 4.8           | 4.9           | 0.0            | 0.3                | 0.3          | 0.0           | 5.3             | 11.0           | 5.7            | 1.5             | 3.7            | 2.2           |
| ElectricHeatpower | 132.2         | 54.8          | -77.3          | 5.5                | 4.7          | -0.8          | 11671.7         | 8997.9         | -2673.8        | 6622.7          | 8957.7         | 2335.0        |
| GasSupply         | 9.5           | 2.7           | -6.7           | 6.3                | 1.0          | -5.3          | 18.8            | 20.1           | 1.3            | 6.6             | 10.8           | 4.2           |
| WaterSupply       | 23.7          | 25.4          | 1.8            | 2.2                | 1.0          | -1.2          | 5.3             | 2.1            | -3.2           | 1.2             | 0.7            | -0.5          |
| <b>total</b>      | <b>4595.6</b> | <b>3556.9</b> | <b>-1038.7</b> | <b>457.9</b>       | <b>227.4</b> | <b>-230.5</b> | <b>19540.9</b>  | <b>17026.4</b> | <b>-2514.5</b> | <b>10260.3</b>  | <b>13729.4</b> | <b>3469.1</b> |

Data sources: *Annual Statistic Report on Environment in China (2005 and 2010)*<sup>1</sup>.

**Table S5 Changes of major pollutants intensity by sectors during 11th FYP (unit: kg/10<sup>4</sup> CNY)**

| Sectors           | COD         |   |             | NH <sub>3</sub> -N |   |             | SO <sub>2</sub> |   |             | NO <sub>x</sub> |   |             |
|-------------------|-------------|---|-------------|--------------------|---|-------------|-----------------|---|-------------|-----------------|---|-------------|
|                   | 2005        |   | 2010        | 2005               |   | 2010        | 2005            |   | 2010        | 2006            |   | 2010        |
| Agriculture       | 0.00        | - | 0.00        | 0.00               | - | 0.00        | 0.00            | - | 0.00        | 0.00            | - | 0.00        |
| CoalMining        | 2.05        | ↓ | 1.12        | 0.02               | ↑ | 0.04        | 1.97            | ↓ | 0.99        | 0.65            | ↓ | 0.35        |
| CrudeOilGas       | 2.13        | ↓ | 1.26        | 0.05               | ↑ | 0.06        | 1.99            | ↓ | 0.78        | 0.40            | ↓ | 0.22        |
| MetalOre          | 4.11        | ↓ | 1.94        | 0.03               | ↑ | 0.05        | 5.78            | ↑ | 6.88        | 0.83            | ↓ | 0.21        |
| NonmetalOre       | 0.68        | ↓ | 0.48        | 0.05               | ↓ | 0.01        | 5.52            | ↓ | 1.16        | 1.45            | ↓ | 0.35        |
| FoodTobacco       | 11.65       | ↓ | 6.82        | 0.54               | ↓ | 0.22        | 1.96            | ↓ | 0.97        | 0.85            | ↓ | 0.42        |
| Textiles          | 6.74        | ↓ | 5.49        | 0.15               | ↑ | 0.16        | 2.17            | ↓ | 1.09        | 0.93            | ↓ | 0.42        |
| ClothingLeather   | 3.15        | ↓ | 2.06        | 0.04               | ↑ | 0.09        | 0.42            | ↓ | 0.14        | 0.17            | ↓ | 0.07        |
| WoodFurniture     | 0.76        | ↓ | 0.31        | 0.03               | ↓ | 0.01        | 0.89            | ↓ | 0.28        | 0.26            | ↓ | 0.12        |
| PaperPrinting     | 50.37       | ↓ | 26.55       | 0.50               | ↓ | 0.25        | 5.40            | ↓ | 3.65        | 2.28            | ↓ | 1.22        |
| PetrolCoking      | 3.61        | ↓ | 1.83        | 0.54               | ↓ | 0.51        | 8.85            | ↑ | 9.72        | 1.38            | ↓ | 1.35        |
| Chemical          | 5.76        | ↓ | 3.44        | 1.15               | ↓ | 0.57        | 5.97            | ↓ | 3.07        | 1.92            | ↓ | 0.86        |
| NonmetalProducts  | 0.53        | ↓ | 0.20        | 0.01               | - | 0.01        | 12.63           | ↓ | 5.14        | 4.90            | ↓ | 4.04        |
| MetalSmelt        | 1.12        | ↓ | 0.82        | 0.16               | ↓ | 0.07        | 17.32           | ↓ | 12.96       | 2.27            | ↓ | 1.48        |
| MetalProducts     | 0.75        | ↓ | 0.35        | 0.01               | ↑ | 0.02        | 0.22            | ↓ | 0.19        | 0.12            | ↓ | 0.08        |
| GenSpecIMch       | 0.23        | ↓ | 0.10        | 0.02               | ↓ | 0.01        | 0.44            | ↓ | 0.22        | 0.17            | ↓ | 0.11        |
| Transportequip    | 0.50        | ↓ | 0.21        | 0.02               | ↓ | 0.01        | 0.38            | ↓ | 0.09        | 0.41            | ↓ | 0.07        |
| ElectricalEquip   | 0.22        | ↓ | 0.09        | 0.00               | - | 0.00        | 0.19            | ↓ | 0.05        | 0.04            | ↓ | 0.02        |
| ElectronicEquip   | 0.22        | ↓ | 0.21        | 0.01               | - | 0.01        | 0.10            | ↓ | 0.02        | 0.05            | ↓ | 0.02        |
| MeasureInstru     | 0.64        | ↓ | 0.18        | 0.03               | ↓ | 0.01        | 0.44            | ↓ | 0.03        | 0.35            | ↓ | 0.01        |
| ArtworkOthers     | 0.13        | ↑ | 0.14        | 0.01               | ↓ | 0.00        | 0.12            | - | 0.12        | 0.03            | - | 0.03        |
| ElectricHeatpower | 1.18        | ↓ | 0.31        | 0.04               | ↓ | 0.02        | 59.70           | ↑ | 62.56       | 30.36           | ↓ | 20.68       |
| GasSupply         | 6.95        | ↓ | 0.60        | 0.84               | ↓ | 0.07        | 3.04            | ↓ | 1.63        | 0.82            | ↓ | 0.51        |
| WaterSupply       | 7.20        | ↑ | 7.81        | 0.37               | ↓ | 0.21        | 0.59            | ↓ | 0.14        | 0.10            | ↓ | 0.04        |
| Construction      | 0.00        | - | 0.00        | 0.00               | - | 0.00        | 0.00            | - | 0.00        | 0.00            | - | 0.00        |
| Services          | 0.00        | - | 0.00        | 0.00               | - | 0.00        | 0.00            | - | 0.00        | 0.00            | - | 0.00        |
| <b>Total</b>      | <b>2.37</b> | ↓ | <b>1.45</b> | <b>0.14</b>        | ↓ | <b>0.09</b> | <b>4.69</b>     | ↓ | <b>4.10</b> | <b>1.72</b>     | ↓ | <b>1.18</b> |

Method and data sources: The pollutant generation intensity of each sector are represented by the pollutant generation per unit of total output by sector (each sector' pollutant generation intensity= pollutant generation ÷ output). Each sectors' pollutant generation are from *Annual Statistic Report on Environment in China*; each sectors' outputs are from MIOTs used in our paper, which were all converted into 2010 constant prices on the basis of the producer price indices.

**Table S6 Changes of major pollutants emission ratio by sectors during 11th FYP (unit: %)**

| Sectors         | COD  |   |      | NH <sub>3</sub> -N |   |      | SO <sub>2</sub> |   |      | NO <sub>x</sub> |   |      |
|-----------------|------|---|------|--------------------|---|------|-----------------|---|------|-----------------|---|------|
|                 | 2005 |   | 2010 | 2005               |   | 2010 | 2005            |   | 2010 | 2006            |   | 2010 |
| Agriculture     | 0.0  | - | 0.0  | 0.0                | - | 0.0  | 0.0             | - | 0.0  | 0.0             | - | 0.0  |
| CoalMining      | 20.6 | ↑ | 42.3 | 88.3               | ↓ | 71.1 | 78.8            | ↓ | 76.4 | 98.0            | ↑ | 99.1 |
| CrudeOilGas     | 10.5 | ↑ | 20.8 | 60.5               | ↓ | 14.6 | 21.7            | ↑ | 36.9 | 98.5            | ↑ | 99.6 |
| MetalOre        | 55.0 | ↓ | 20.0 | 95.2               | ↓ | 63.1 | 57.4            | ↓ | 22.0 | 93.5            | ↑ | 98.6 |
| NonmetalOre     | 99.8 | ↓ | 32.9 | 100.0              | ↓ | 47.0 | 35.2            | ↑ | 66.4 | 99.7            | ↓ | 97.8 |
| FoodTobacco     | 33.6 | ↓ | 20.1 | 59.1               | ↓ | 28.3 | 72.2            | ↓ | 68.6 | 94.8            | ↑ | 95.8 |
| Textiles        | 25.2 | ↓ | 17.3 | 64.6               | ↓ | 35.3 | 77.4            | ↓ | 71.3 | 92.9            | ↑ | 97.6 |
| ClothingLeather | 5.8  | ↑ | 16.8 | 34.1               | ↓ | 30.3 | 75.5            | ↑ | 80.4 | 96.8            | ↑ | 98.2 |
| WoodFurniture   | 53.5 | ↓ | 33.9 | 95.4               | ↓ | 52.5 | 81.8            | ↑ | 83.0 | 98.4            | ↑ | 99.3 |
| PaperPrinting   | 28.5 | ↓ | 17.6 | 76.2               | ↓ | 50.0 | 72.5            | ↓ | 68.8 | 91.9            | ↑ | 95.9 |
| PetrolCoking    | 12.8 | ↑ | 14.4 | 16.7               | ↓ | 4.9  | 44.3            | ↓ | 21.0 | 87.7            | ↓ | 82.4 |
| Chemical        | 32.0 | ↓ | 22.2 | 46.2               | ↓ | 17.0 | 53.5            | ↓ | 46.4 | 86.7            | ↑ | 92.6 |

| Sectors           | COD         |               | NH <sub>3</sub> -N |               | SO <sub>2</sub> |               | NO <sub>x</sub> |               |
|-------------------|-------------|---------------|--------------------|---------------|-----------------|---------------|-----------------|---------------|
|                   | 2005        | 2010          | 2005               | 2010          | 2005            | 2010          | 2006            | 2010          |
| NonmetalProducts  | 54.8        | ↓ 37.6        | 75.6               | ↓ 58.0        | 78.2            | ↑ 80.6        | 94.4            | ↑ 97.1        |
| MetalSmelt        | 47.0        | ↓ 20.4        | 49.5               | ↓ 28.0        | 30.8            | ↓ 24.4        | 97.1            | ↓ 96.6        |
| MetalProducts     | 18.7        | ↑ 30.0        | 61.8               | ↓ 48.6        | 81.9            | ↓ 76.5        | 93.4            | ↑ 94.4        |
| GenSpecIMch       | 49.9        | ↓ 41.3        | 71.5               | ↓ 43.7        | 70.3            | ↓ 65.2        | 83.9            | ↑ 99.4        |
| Transportequip    | 50.9        | ↓ 45.8        | 77.4               | ↓ 36.7        | 72.6            | ↓ 67.0        | 89.5            | ↑ 98.0        |
| ElectricalEquip   | 23.2        | ↑ 32.5        | 49.7               | ↑ 55.3        | 76.1            | ↓ 67.5        | 99.1            | ↓ 87.7        |
| ElectronicEquip   | 31.7        | ↓ 25.8        | 71.6               | ↓ 35.8        | 69.7            | ↓ 63.1        | 98.1            | ↓ 95.1        |
| MeasureInstru     | 42.3        | ↓ 30.7        | 47.9               | ↑ 48.8        | 85.3            | ↓ 55.7        | 99.7            | ↓ 99.2        |
| ArtworkOthers     | 66.1        | ↓ 26.5        | 84.2               | ↓ 44.6        | 77.8            | ↓ 67.5        | 91.1            | ↑ 97.9        |
| ElectricHeatpower | 46.7        | ↓ 38.7        | 53.9               | ↑ 55.1        | 81.7            | ↓ 31.7        | 91.2            | ↑ 95.4        |
| GasSupply         | 15.5        | ↑ 20.6        | 85.5               | ↓ 63.9        | 70.6            | ↓ 56.0        | 91.2            | ↑ 96.5        |
| WaterSupply       | 27.1        | ↓ 19.0        | 48.4               | ↓ 26.6        | 74.0            | ↑ 85.1        | 98.4            | ↑ 100         |
| Construction      | 0.0         | - 0.0         | 0.0                | - 0.0         | 0.0             | - 0.0         | 0.0             | - 0.0         |
| Services          | 0.0         | - 0.0         | 0.0                | - 0.0         | 0.0             | - 0.0         | 0.0             | - 0.0         |
| <b>Total</b>      | <b>29.9</b> | <b>↓ 20.1</b> | <b>48.7</b>        | <b>↓ 21.7</b> | <b>64.3</b>     | <b>↓ 34.0</b> | <b>91.7</b>     | <b>↑ 95.3</b> |

### 3. Data of outdated production facilities being shut down

In this part, we need to calculate pollution generation reductions caused by outdated production facilities being shut down during 12th FYP. Therefore, we first find out each outdated sector's production facilities being shut down during 11th FYP (Table S7); then we calculate pollutant generation intensity of each outdated sector by using its products outputs and pollution generation data (Table S8); finally, we multiply outdated production facilities that will be shut down during 12th FYP by pollutant generation intensity of each outdated sector and calculate each outdated sector's potential pollution generation reductions, which were listed at right of Table S9.

**Table S7 Outdated production facilities being shut down during 11th FYP in China**

| sectors              | units             | 2007   | 2008  | 2009  | 2010    | total   |
|----------------------|-------------------|--------|-------|-------|---------|---------|
| Iron                 | million tons      | 0.00   | 0.00  | 21.13 | 36.07   | 57.20   |
| Steel                | million tons      | 170.19 | 0.00  | 16.91 | 9.35    | 196.45  |
| coke                 | million tons      | 31.47  | 36.92 | 18.09 | 25.87   | 112.35  |
| iron alloy           | million tons      | 1.29   | 1.18  | 1.62  | 1.72    | 5.81    |
| calcium carbide      | million tons      | 0.80   | 1.05  | 0.47  | 0.75    | 3.06    |
| Non-Ferrous Metals   | million tons      | 0.00   | 0.00  | 0.31  | 1.08    | 1.39    |
| cement               | million tons      | 132.75 | 85.14 | 74.16 | 107.28  | 399.33  |
| Glass                | million cartons   | 0.00   | 0.00  | 6.00  | 9.94    | 15.94   |
| Paper                | million tons      | 4.50   | 0.00  | 0.51  | 4.65    | 9.66    |
| alcohol              | million tons      | 0.42   | 0.00  | 0.36  | 0.68    | 1.46    |
| monosodium glutamate | million tons      | 0.07   | 0.00  | 0.04  | 0.20    | 0.30    |
| citric acid          | million tons      | 0.00   | 0.00  | 0.01  | 0.02    | 0.03    |
| tanning              | million pieces    | 0.00   | 0.00  | 0.00  | 14.36   | 14.36   |
| dyeing               | million meters    | 0.00   | 0.00  | 0.00  | 3813.56 | 3813.56 |
| chemical fiber       | million tons      | 0.00   | 0.00  | 0.00  | 0.67    | 0.67    |
| coal-fired power     | million kilowatts | 0.00   | 0.00  | 21.13 | 36.07   | 57.20   |

Data sources: enterprises lists of shut-downs outdated production capacity during 2006 to 2010, released by China's Ministry of Industry and Information Technology and National Development and Reform Commission on their homepage, <http://www.miit.gov.cn/n11293472/index.html> and <http://www.sdpc.gov.cn/>.

**Table S8 Products outputs and pollution generation of heavy pollution sectors in 2007**

| Sectors               | Products outputs |                           |         | Pollution generation by sectors (unit: 10 <sup>4</sup> tons) |                    |                 |                 |         |
|-----------------------|------------------|---------------------------|---------|--------------------------------------------------------------|--------------------|-----------------|-----------------|---------|
|                       | values           | unit                      | Sources | COD                                                          | NH <sub>3</sub> -N | SO <sub>2</sub> | NO <sub>x</sub> | Sources |
| Coal-fired power      | 27229.3          | 10 <sup>8</sup> kilowatts | (1)     | 142051.3                                                     | 1126.9             | 18982738.5      | 7232440.2       | (7)     |
| Iron                  | 47651.6          | 10 <sup>4</sup> tons      | (1)     | 175176.3                                                     | 3933.8             | 1205752.7       | 281642.4        | (7)     |
| Steel                 | 48928.8          | 10 <sup>4</sup> tons      | (1)     | 310345.8                                                     | 6756.5             | 604079.9        | 197557.2        | (7)     |
| Iron alloy            | 1746.7           | 10 <sup>4</sup> tons      | (2)     | 20736.7                                                      | 240.9              | 75634.2         | 11743.6         | (7)     |
| Copper                | 349.9            | 10 <sup>4</sup> tons      | (3)     | 27861.1                                                      | 40.9               | 3895139.3       | 708.5           | (7)     |
| Electrolytic aluminum | 1258.8           | 10 <sup>4</sup> tons      | (3)     | 22291.6                                                      | 893.2              | 410312.0        | 127101.0        | (7)     |
| Lead and Zinc         | 647.4            | 10 <sup>4</sup> tons      | (3)     | 20084.3                                                      | 323.8              | 3854692.5       | 4754.2          | (7)     |
| Coke                  | 33553.4          | 10 <sup>4</sup> tons      | (1)     | 411487.0                                                     | 45561.2            | 384798.8        | 184543.1        | (7)     |
| Cement                | 136117.3         | 10 <sup>4</sup> tons      | (1)     | 31778.9                                                      | 278.2              | 727570.6        | 1091993.2       | (7)     |
| Glass                 | 53918.1          | 10 <sup>4</sup> cartons   | (1)     | 10707.2                                                      | 554.7              | 163183.6        | 122535.1        | (7)     |
| Paper                 | 7792.4           | 10 <sup>4</sup> tons      | (1)     | 1067094.5                                                    | 5970.3             | 732568.0        | 182429.6        | (7)     |
| Chemical fiber        | 2413.8           | 10 <sup>4</sup> tons      | (1)     | 28790.0                                                      | 290.2              | 16290.8         | 11706.7         | (7)     |
| Dyeing                | 675.3            | 10 <sup>8</sup> meters    | (1)     | 2648413.8                                                    | 20351.2            | 7369.1          | 1357.1          | (7)     |
| Tanning               | 7000.0           | 10 <sup>4</sup> pieces    | (4)     | 352668.2                                                     | 29436.9            | 15850.4         | 4471.7          | (7)     |
| Alcohol               | 636.0            | 10 <sup>4</sup> tons      | (5)     | 3154443.8                                                    | 7112.6             | 40733.5         | 12818.0         | (7)     |
| Monosodium glutamate  | 191.3            | 10 <sup>4</sup> tons      | (6)     | 872180.8                                                     | 163621.3           | 30685.7         | 11391.4         | (7)     |

Data sources: (1) China Statistical Yearbook 2008<sup>2</sup>; (2) China ferroalloy online: <http://www.cnfeol.com/news/statistic/-20080304-/16130122544.aspx>; (3) China nonferrous metals industry yearbook 2008<sup>3</sup>; (4) China leather market forecast report 2009<sup>4</sup>; (5) Chinese wine: <http://www.zgnj.org/magazine/info8127.html>; (6) Hexun online: <http://www.boyar.cn/-article/2009/05/19/223063.shtml>; (7) China's pollution census database.

**Table S9 Outdated production facilities will be shut down during 12th FYP in China**

| Sectors               | Facilities being shut down during 12th FYP |                           | Pollution generation reduction by sectors (unit: tons) |                    |                  |                 |
|-----------------------|--------------------------------------------|---------------------------|--------------------------------------------------------|--------------------|------------------|-----------------|
|                       | values                                     | units                     | COD                                                    | NH <sub>3</sub> -N | SO <sub>2</sub>  | NO <sub>x</sub> |
| Coal-fired power      | 2000                                       | 10 <sup>8</sup> kilowatts | 1.0                                                    | 0.0                | 139.4            | 53.1            |
| Iron                  | 4800                                       | 10 <sup>4</sup> tons      | 17645.7                                                | 396.3              | 121456.8         | 28370.1         |
| Steel                 | 4800                                       | 10 <sup>4</sup> tons      | 30445.5                                                | 662.8              | 59261.3          | 19380.7         |
| Iron alloy            | 740                                        | 10 <sup>4</sup> tons      | 8785.2                                                 | 102.1              | 32042.9          | 4975.3          |
| Copper                | 80                                         | 10 <sup>4</sup> tons      | 6369.3                                                 | 9.3                | 890470.2         | 162.0           |
| Electrolytic aluminum | 90                                         | 10 <sup>4</sup> tons      | 1593.7                                                 | 63.9               | 29335.2          | 9087.1          |
| Lead and Zinc         | 195                                        | 10 <sup>4</sup> tons      | 6049.5                                                 | 97.5               | 1161052.0        | 1432.0          |
| Coke                  | 4200                                       | 10 <sup>4</sup> tons      | 51507.3                                                | 5703.1             | 48166.6          | 23099.9         |
| Cement                | 37000                                      | 10 <sup>4</sup> tons      | 8638.3                                                 | 75.6               | 197771.5         | 296830.5        |
| Glass                 | 9000                                       | 10 <sup>4</sup> cartons   | 1787.3                                                 | 92.6               | 27238.6          | 20453.6         |
| Paper                 | 1500                                       | 10 <sup>4</sup> tons      | 205409.8                                               | 1149.3             | 141015.3         | 35116.7         |
| Chemical fiber        | 59                                         | 10 <sup>4</sup> tons      | 703.7                                                  | 7.1                | 398.2            | 286.1           |
| Dyeing                | 55.8                                       | 10 <sup>8</sup> meters    | 218851.2                                               | 1681.7             | 608.9            | 112.1           |
| Tanning               | 1100                                       | 10 <sup>4</sup> pieces    | 55419.3                                                | 4625.8             | 2490.8           | 702.7           |
| Alcohol               | 100                                        | 10 <sup>4</sup> tons      | 495997.3                                               | 1118.4             | 6404.8           | 2015.5          |
| Monosodium glutamate  | 18.2                                       | 10 <sup>4</sup> tons      | 82982.3                                                | 15567.5            | 2919.5           | 1083.8          |
| Total                 | -                                          | -                         | <b>1192186.5</b>                                       | <b>31352.9</b>     | <b>2720772.1</b> | <b>443161.2</b> |

Data sources: outdated production facilities being shut down during 12th FYP are from The Energy Conservation and Emission Reduction 12th Five-Year Plan<sup>5</sup>; the results of each outdated sector's potential pollution generation reductions during 12th FYP are listed at right of Table S9.

#### 4 Changes of structural factors between 2005 and 2010

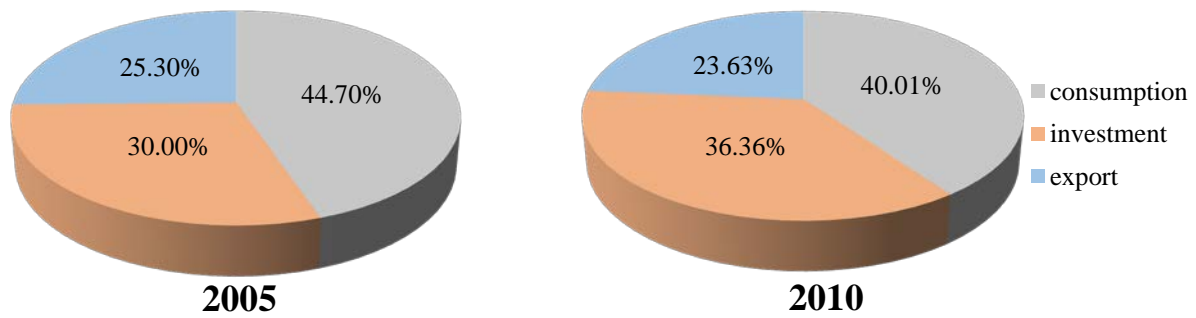

Figure S1 The percentage of three categories of final demand

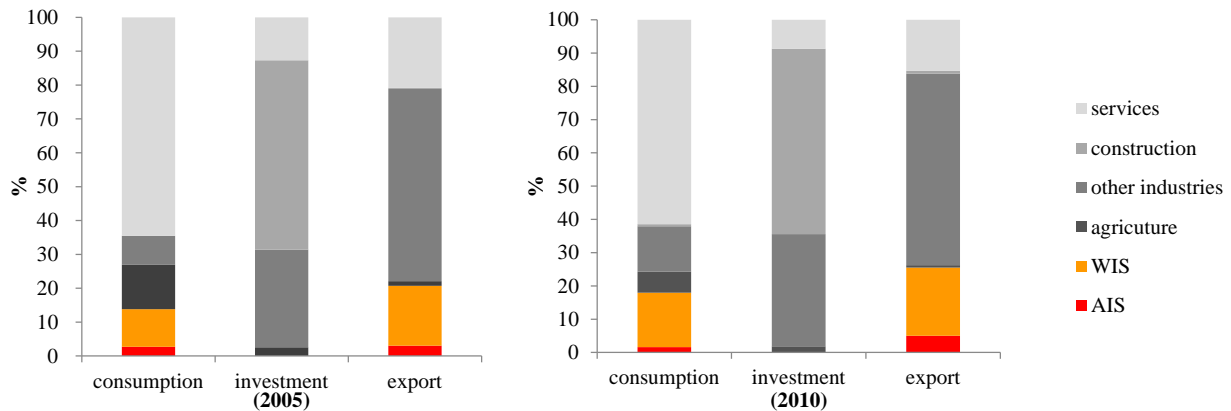

**Figure S2 The percentage of heavy-pollution industries on three categories of final demand.** To determine the change in the final demand structure, we merged 26 sectors in the MIOTs into four normal aggregated sectors (services, construction, other industries, agriculture) and two pollution-intensive sectors (wastewater-intensive sectors and atmospheric-intensive sectors). wastewater-intensive sectors (WIS) mainly include *food and tobacco, textiles, papermaking and printing, chemical products*; as well as atmospheric-intensive sectors (AIS) mainly include *nonmetallic mineral products, metal smelting and rolling, electric and heat power*.

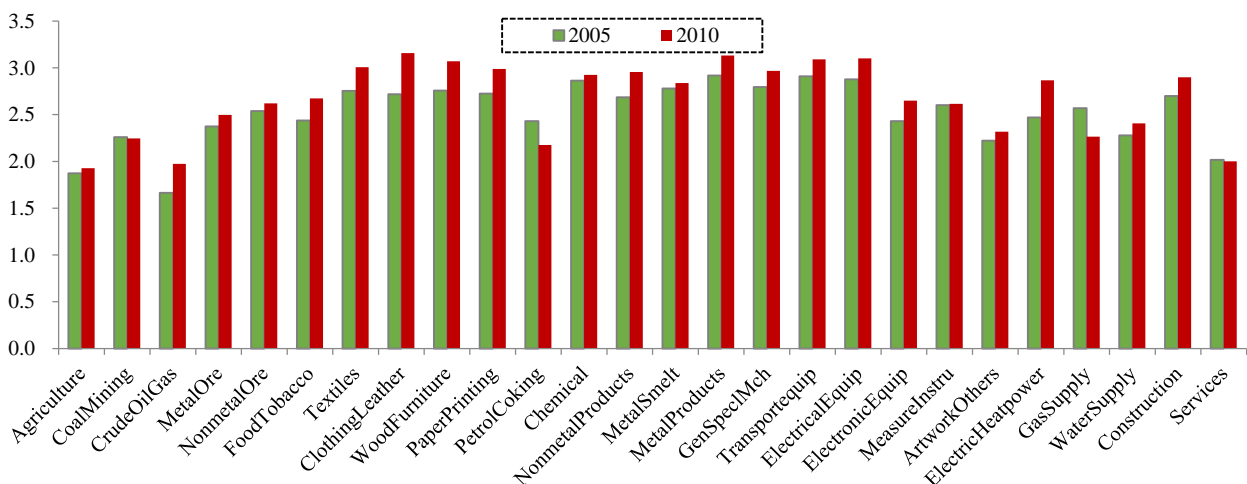

**Figure S3 Changes of total input coefficients between 2005 and 2010.** To reflect the change in the production structure, we defined the Total Input Multiplier (TIM) as the gross of intermediate inputs of the other sectors to one sector to produce one unit of final goods, which is the summation of the Leontief inverse matrix by columns and indicates a sector's magnitude of material needs throughout the supply chain.



**Table S10 Prediction China's GDP value in 2014 and 2015.** China are experiencing terrible annoyances in its social, economy and environment problem due to fast and poor-quality GDP growth, which regard investment and real estate as motive force of China's economy. From 2012, the Chinese central government think China's economy is entering to "The New Normal" stage and lowered China's economic growth rate (about 7%) in its 12th Five-Year Plan.

| years | Average growth rate of GDP per year (unit:%) | Gross GDP(unit:10 <sup>8</sup> CNY) |
|-------|----------------------------------------------|-------------------------------------|
| 2010  | 10.4                                         | 473600*                             |
| 2011  | 9.3                                          | 517645                              |
| 2012  | 7.7                                          | 557503                              |
| 2013  | 7.7                                          | 600431                              |
| 2014  | 7 (predicated in 12th FYP <sup>6</sup> )     | 642461                              |
| 2015  | 7 (predicated in 12th FYP <sup>6</sup> )     | 687433                              |

Data sources: the growth rate of GDP during 2011-2013 are from China Statistical Yearbook 2013<sup>7</sup>, as well as growth rate of GDP of 2014 and 2015 are from 12th Five-Year Plan for national economic and social development, released by National Development and Reform Commission of China.

\*notes: The values of GDP used in this paper differ from public data because we define GDP as the aggregation of gross consumption, export and fixed capital formation from the MIOTs, which do not include inventories or imports. The GDP in 2010 are from 2010 MIOTs, and the GDP from 2011 to 2015 are multiply GDP growth rates by previous year's GDP values.

**Table S11 Existing data in the first three years of 12th FYP and the gaps to achieve goals in 2015 (unit: 10<sup>6</sup> tons)**

|               | Years              | COD   | NH <sub>3</sub> -N | SO <sub>2</sub> | NO <sub>x</sub> |
|---------------|--------------------|-------|--------------------|-----------------|-----------------|
| Baseline data | 2010               | 3.56  | 0.23               | 17.03           | 13.73           |
|               | 2011               | 3.55  | 0.28               | 20.17           | 17.30           |
| Existing data | 2012               | 3.38  | 0.26               | 19.12           | 16.58           |
|               | 2013               | 3.19  | 0.25               | 18.35           | 15.46           |
|               | 2013 ÷ 2010 × 100% | 89.8% | 108.1%             | 107.8%          | 112.6%          |
| Target        | 2015               | 3.20  | 0.19               | 15.32           | 11.67           |
|               | 2015 ÷ 2010 × 100% | 90%   | 85%                | 90%             | 85%             |

Data sources: emission data of major pollutants during 2010 to 2013 are from *Annual Statistic Report on Environment in China*<sup>8</sup>, while emission data of major pollutants in 2015 are predicted according to the Energy Conservation and Emission Reduction 12th Five-Year Plan<sup>5</sup>.

## 5. Structural decomposition results between 2005 and 2010

The detailed structural decomposition results on the emission changes of four major pollutants during 11th FYP are presented in Table S12-S15. Each driving factor's contributions on emission changes are converted to percentage values based on sector's emission values in 2005.

**Table S12 Driving factor's contributions on COD emission changes at the sector level (unit: %)**

| sectors           | end-of-pipe<br>abatement<br>efficiency<br>( $\Delta E$ ) | pollutant<br>generation<br>intensity<br>( $\Delta F$ ) | production<br>structure<br>( $\Delta L$ ) | final<br>demand<br>structure<br>( $\Delta M$ ) | final<br>demand<br>composition<br>( $\Delta N$ ) | total final<br>demand<br>( $\Delta G$ ) | total<br>change( $\Delta Q$ ) |
|-------------------|----------------------------------------------------------|--------------------------------------------------------|-------------------------------------------|------------------------------------------------|--------------------------------------------------|-----------------------------------------|-------------------------------|
| CoalMining        | 97.5                                                     | -82.7                                                  | -15.3                                     | -0.7                                           | 2.4                                              | 73.3                                    | 74.6                          |
| CrudeOilGas       | 97.2                                                     | -74.0                                                  | -11.0                                     | 4.7                                            | 0.3                                              | 77.5                                    | 94.8                          |
| MetalOre          | -80.8                                                    | -95.7                                                  | 72.4                                      | 6.2                                            | 5.8                                              | 48.3                                    | -43.9                         |
| NonmetalOre       | -76.3                                                    | -32.2                                                  | -2.1                                      | -0.9                                           | 8.2                                              | 45.3                                    | -58.0                         |
| FoodTobacco       | -48.0                                                    | -61.3                                                  | 27.4                                      | 18.7                                           | -8.1                                             | 53.9                                    | -17.4                         |
| Textiles          | -38.6                                                    | -23.0                                                  | 22.8                                      | -11.5                                          | -6.7                                             | 57.7                                    | 0.7                           |
| ClothingLeather   | 212.9                                                    | -83.1                                                  | 32.2                                      | 1.2                                            | -13.3                                            | 112.9                                   | 262.7                         |
| WoodFurniture     | -33.6                                                    | -81.2                                                  | 16.2                                      | 2.4                                            | 1.5                                              | 47.6                                    | -47.0                         |
| PaperPrinting     | -37.5                                                    | -57.9                                                  | 19.5                                      | -10.1                                          | -3.5                                             | 49.0                                    | -40.4                         |
| PetrolCoking      | 11.9                                                     | -70.4                                                  | -3.4                                      | 2.4                                            | 0.6                                              | 57.1                                    | -1.9                          |
| Chemical          | -34.2                                                    | -55.6                                                  | 0.5                                       | 20.9                                           | -0.4                                             | 54.6                                    | -14.2                         |
| NonmetalProducts  | -29.2                                                    | -90.8                                                  | 20.1                                      | -1.1                                           | 11.0                                             | 48.9                                    | -41.0                         |
| MetalSmelt        | -70.4                                                    | -33.2                                                  | 1.2                                       | 10.1                                           | 6.9                                              | 50.1                                    | -35.4                         |
| MetalProducts     | 53.7                                                     | -88.4                                                  | 18.7                                      | -26.3                                          | 4.6                                              | 62.8                                    | 25.2                          |
| GenSpecIMch       | -16.5                                                    | -91.2                                                  | 27.0                                      | -7.1                                           | 11.4                                             | 52.5                                    | -23.8                         |
| Transportequip    | -12.8                                                    | -133.7                                                 | 26.7                                      | 87.9                                           | 6.9                                              | 66.2                                    | 41.3                          |
| ElectricalEquip   | 39.2                                                     | -110.6                                                 | 14.9                                      | 23.0                                           | 2.0                                              | 64.5                                    | 33.1                          |
| ElectronicEquip   | -28.7                                                    | -5.3                                                   | 26.6                                      | 10.6                                           | -4.5                                             | 72.5                                    | 71.2                          |
| MeasureInstru     | -21.9                                                    | -100.6                                                 | 11.2                                      | 8.2                                            | 0.6                                              | 45.5                                    | -57.0                         |
| ArtworkOthers     | -105.1                                                   | 13.1                                                   | 17.9                                      | 15.5                                           | 1.3                                              | 57.6                                    | 0.4                           |
| ElectricHeatpower | -12.8                                                    | -100.5                                                 | 7.9                                       | 0.7                                            | 0.9                                              | 45.2                                    | -58.5                         |
| GasSupply         | 19.7                                                     | -175.0                                                 | 26.5                                      | 20.1                                           | -5.0                                             | 42.5                                    | -71.2                         |
| WaterSupply       | -37.9                                                    | 8.9                                                    | -53.6                                     | 34.4                                           | -3.5                                             | 59.1                                    | 7.4                           |
| <b>Total</b>      | -35.6                                                    | -58.6                                                  | 16.6                                      | 5.1                                            | -2.8                                             | 52.8                                    | -22.6                         |

**Table S13 Driving factor's contributions on NH<sub>3</sub>-N emission changes at the sector level (unit: %)**

| sectors           | end-of-pipe<br>abatement<br>efficiency<br>( $\Delta E$ ) | pollutant<br>generation<br>intensity<br>( $\Delta F$ ) | production<br>structure<br>( $\Delta L$ ) | final<br>demand<br>structure<br>( $\Delta M$ ) | final<br>demand<br>composition<br>( $\Delta N$ ) | total final<br>demand<br>( $\Delta G$ ) | total change<br>( $\Delta Q$ ) |
|-------------------|----------------------------------------------------------|--------------------------------------------------------|-------------------------------------------|------------------------------------------------|--------------------------------------------------|-----------------------------------------|--------------------------------|
| CoalMining        | -41.4                                                    | 127.7                                                  | -18.2                                     | -1.1                                           | 3.1                                              | 91.6                                    | -41.4                          |
| CrudeOilGas       | -103.2                                                   | 3.5                                                    | -7.2                                      | 2.7                                            | 0.4                                              | 45.2                                    | -103.2                         |
| MetalOre          | -111.9                                                   | 143.0                                                  | 104.0                                     | 12.1                                           | 11.4                                             | 115.3                                   | -111.9                         |
| NonmetalOre       | -40.1                                                    | -82.3                                                  | -2.0                                      | -0.9                                           | 7.8                                              | 41.5                                    | -40.1                          |
| FoodTobacco       | -51.2                                                    | -84.1                                                  | 25.3                                      | 17.1                                           | -7.3                                             | 46.1                                    | -51.2                          |
| Textiles          | -66.4                                                    | 8.2                                                    | 23.1                                      | -11.6                                          | -6.8                                             | 58.6                                    | -66.4                          |
| ClothingLeather   | -29.5                                                    | 174.0                                                  | 33.1                                      | 1.2                                            | -13.7                                            | 117.0                                   | -29.5                          |
| WoodFurniture     | -33.0                                                    | -102.0                                                 | 15.3                                      | 2.2                                            | 1.4                                              | 41.9                                    | -33.0                          |
| PaperPrinting     | -32.8                                                    | -62.8                                                  | 19.5                                      | -10.1                                          | -3.5                                             | 49.0                                    | -32.8                          |
| PetrolCoking      | -93.0                                                    | -5.6                                                   | -2.9                                      | 1.9                                            | 0.6                                              | 46.4                                    | -93.0                          |
| Chemical          | -64.0                                                    | -61.6                                                  | 0.3                                       | 18.6                                           | -0.2                                             | 44.4                                    | -64.0                          |
| NonmetalProducts  | -32.8                                                    | -29.1                                                  | 23.1                                      | -1.2                                           | 13.6                                             | 65.9                                    | -32.8                          |
| MetalSmelt        | -40.7                                                    | -74.6                                                  | 1.1                                       | 9.7                                            | 6.6                                              | 46.8                                    | -40.7                          |
| MetalProducts     | -44.6                                                    | 110.0                                                  | 24.1                                      | -33.8                                          | 5.8                                              | 89.3                                    | -44.6                          |
| GenSpecIMch       | -38.2                                                    | -82.2                                                  | 26.1                                      | -7.0                                           | 11.0                                             | 48.8                                    | -38.2                          |
| Transportequip    | -98.7                                                    | -54.4                                                  | 26.5                                      | 86.8                                           | 6.7                                              | 64.0                                    | -98.7                          |
| ElectricalEquip   | 16.2                                                     | -33.3                                                  | 16.6                                      | 26.2                                           | 2.8                                              | 80.5                                    | 16.2                           |
| ElectronicEquip   | -161.3                                                   | 201.7                                                  | 31.1                                      | 13.0                                           | -5.4                                             | 94.1                                    | -161.3                         |
| MeasureInstru     | 1.6                                                      | -104.4                                                 | 11.9                                      | 9.0                                            | 0.4                                              | 51.1                                    | 1.6                            |
| ArtworkOthers     | -66.0                                                    | -29.5                                                  | 17.8                                      | 15.4                                           | 1.3                                              | 56.6                                    | -66.0                          |
| ElectricHeatpower | 2.1                                                      | -82.2                                                  | 9.0                                       | 0.6                                            | 1.1                                              | 54.4                                    | 2.1                            |
| GasSupply         | -15.2                                                    | -149.5                                                 | 25.8                                      | 19.4                                           | -4.8                                             | 39.7                                    | -15.2                          |
| WaterSupply       | -40.7                                                    | -42.2                                                  | -44.2                                     | 28.0                                           | -2.4                                             | 45.8                                    | -40.7                          |
| <b>Total</b>      | -56.5                                                    | -60.5                                                  | 8.4                                       | 12.8                                           | -1.4                                             | 46.9                                    | -56.5                          |

**Table S14 Driving factor's contributions on SO<sub>2</sub> emission changes at the sector level (unit: %)**

| sectors           | end-of-pipe<br>abatement<br>efficiency<br>( $\Delta E$ ) | pollutant<br>generation<br>intensity<br>( $\Delta F$ ) | production<br>structure<br>( $\Delta L$ ) | final<br>demand<br>structure<br>( $\Delta M$ ) | final<br>demand<br>composition<br>( $\Delta N$ ) | total final<br>demand<br>( $\Delta G$ ) | total change<br>( $\Delta Q$ ) |
|-------------------|----------------------------------------------------------|--------------------------------------------------------|-------------------------------------------|------------------------------------------------|--------------------------------------------------|-----------------------------------------|--------------------------------|
| CoalMining        | -2.7                                                     | -63.0                                                  | -12.0                                     | -0.2                                           | 1.6                                              | 52.5                                    | -23.8                          |
| CrudeOilGas       | 57.7                                                     | -102.0                                                 | -8.9                                      | 3.6                                            | 0.4                                              | 59.8                                    | 10.6                           |
| MetalOre          | -150.3                                                   | 34.4                                                   | 81.6                                      | 7.9                                            | 7.4                                              | 67.8                                    | 48.9                           |
| NonmetalOre       | 61.2                                                     | -146.4                                                 | -2.2                                      | -1.1                                           | 8.8                                              | 51.6                                    | -28.1                          |
| FoodTobacco       | -5.4                                                     | -84.3                                                  | 29.0                                      | 19.9                                           | -8.8                                             | 59.7                                    | 10.2                           |
| Textiles          | -7.5                                                     | -67.5                                                  | 21.8                                      | -11.0                                          | -6.4                                             | 54.0                                    | -16.5                          |
| ClothingLeather   | 5.4                                                      | -99.0                                                  | 18.7                                      | 0.3                                            | -7.5                                             | 51.0                                    | -31.0                          |
| WoodFurniture     | 1.3                                                      | -105.3                                                 | 16.7                                      | 2.5                                            | 1.6                                              | 50.7                                    | -32.5                          |
| PaperPrinting     | -5.7                                                     | -45.1                                                  | 22.6                                      | -11.8                                          | -3.9                                             | 61.2                                    | 17.4                           |
| PetrolCoking      | -75.9                                                    | 10.7                                                   | -3.3                                      | 2.3                                            | 0.6                                              | 55.4                                    | -10.3                          |
| Chemical          | -13.8                                                    | -71.2                                                  | 0.6                                       | 21.2                                           | -0.4                                             | 55.9                                    | -7.8                           |
| NonmetalProducts  | 3.0                                                      | -97.3                                                  | 21.4                                      | -1.1                                           | 12.2                                             | 56.4                                    | -5.5                           |
| MetalSmelt        | -26.2                                                    | -35.6                                                  | 1.2                                       | 11.4                                           | 7.9                                              | 61.9                                    | 20.7                           |
| MetalProducts     | -8.1                                                     | -17.0                                                  | 19.2                                      | -27.0                                          | 4.7                                              | 65.4                                    | 37.2                           |
| GenSpecIMch       | -7.7                                                     | -81.7                                                  | 28.3                                      | -7.4                                           | 12.1                                             | 57.9                                    | 1.5                            |
| Transportequip    | -7.2                                                     | -176.5                                                 | 25.3                                      | 81.4                                           | 5.7                                              | 53.9                                    | -17.4                          |
| ElectricalEquip   | -8.8                                                     | -122.2                                                 | 13.1                                      | 19.4                                           | 1.2                                              | 46.9                                    | -50.5                          |
| ElectronicEquip   | -6.8                                                     | -124.1                                                 | 20.7                                      | 7.4                                            | -3.4                                             | 44.6                                    | -61.6                          |
| MeasureInstru     | -20.2                                                    | -126.1                                                 | 10.4                                      | 7.2                                            | 0.8                                              | 38.7                                    | -89.2                          |
| ArtworkOthers     | -22.5                                                    | 6.9                                                    | 21.7                                      | 18.8                                           | 1.8                                              | 80.0                                    | 106.6                          |
| ElectricHeatpower | -91.6                                                    | 5.5                                                    | 8.8                                       | 0.6                                            | 1.0                                              | 52.7                                    | -22.9                          |
| GasSupply         | -24.2                                                    | -76.5                                                  | 30.4                                      | 24.3                                           | -6.1                                             | 59.0                                    | 6.8                            |
| WaterSupply       | 10.1                                                     | -97.2                                                  | -43.5                                     | 27.5                                           | -2.3                                             | 44.7                                    | -60.6                          |
| <b>Total</b>      | -62.1                                                    | -20.6                                                  | 9.3                                       | 3.3                                            | 2.4                                              | 54.8                                    | -12.9                          |

**Table S15 Driving factor's contributions on NO<sub>x</sub> emission changes at the sector level (unit: %)**

| sectors           | end-of-pipe<br>abatement<br>efficiency<br>( $\Delta E$ ) | pollutant<br>generation<br>intensity<br>( $\Delta F$ ) | production<br>structure<br>( $\Delta L$ ) | final<br>demand<br>structure<br>( $\Delta M$ ) | final<br>demand<br>composition<br>( $\Delta N$ ) | total final<br>demand<br>( $\Delta G$ ) | total change<br>( $\Delta Q$ ) |
|-------------------|----------------------------------------------------------|--------------------------------------------------------|-------------------------------------------|------------------------------------------------|--------------------------------------------------|-----------------------------------------|--------------------------------|
| CoalMining        | 1.0                                                      | -59.6                                                  | -12.3                                     | -0.3                                           | 1.7                                              | 54.4                                    | -15.1                          |
| CrudeOilGas       | 1.1                                                      | -60.2                                                  | -8.5                                      | 3.4                                            | 0.4                                              | 55.9                                    | -8.0                           |
| MetalOre          | 5.0                                                      | -161.9                                                 | 75.4                                      | 6.7                                            | 6.3                                              | 54.6                                    | -13.9                          |
| NonmetalOre       | -1.3                                                     | -106.2                                                 | -2.1                                      | -0.9                                           | 8.2                                              | 45.6                                    | -56.8                          |
| FoodTobacco       | 1.1                                                      | -85.8                                                  | 29.4                                      | 20.2                                           | -8.9                                             | 61.1                                    | 17.1                           |
| Textiles          | 4.6                                                      | -78.6                                                  | 21.9                                      | -11.0                                          | -6.4                                             | 54.3                                    | -15.2                          |
| ClothingLeather   | 1.3                                                      | -90.5                                                  | 19.0                                      | 0.4                                            | -7.6                                             | 52.2                                    | -25.2                          |
| WoodFurniture     | 0.9                                                      | -83.9                                                  | 17.7                                      | 2.7                                            | 1.8                                              | 56.7                                    | -4.1                           |
| PaperPrinting     | 4.4                                                      | -67.0                                                  | 21.8                                      | -11.3                                          | -3.8                                             | 58.0                                    | 2.0                            |
| PetrolCoking      | -8.1                                                     | -2.6                                                   | -4.1                                      | 2.9                                            | 0.6                                              | 69.9                                    | 58.7                           |
| Chemical          | 6.6                                                      | -86.3                                                  | 0.6                                       | 21.5                                           | -0.4                                             | 57.4                                    | -0.5                           |
| NonmetalProducts  | 4.1                                                      | -29.1                                                  | 25.0                                      | -1.3                                           | 15.3                                             | 76.6                                    | 90.6                           |
| MetalSmelt        | -0.6                                                     | -53.1                                                  | 1.2                                       | 11.7                                           | 8.1                                              | 64.2                                    | 31.5                           |
| MetalProducts     | 1.1                                                      | -48.3                                                  | 18.0                                      | -25.3                                          | 4.5                                              | 59.5                                    | 9.5                            |
| GenSpecIMch       | 22.8                                                     | -60.2                                                  | 32.1                                      | -8.0                                           | 13.8                                             | 73.0                                    | 73.4                           |
| Transportequip    | 7.7                                                      | -200.5                                                 | 24.9                                      | 79.9                                           | 5.5                                              | 50.9                                    | -31.6                          |
| ElectricalEquip   | -13.2                                                    | -71.7                                                  | 14.5                                      | 22.2                                           | 1.8                                              | 60.5                                    | 14.2                           |
| ElectronicEquip   | -2.7                                                     | -103.0                                                 | 22.2                                      | 8.3                                            | -3.7                                             | 51.8                                    | -27.0                          |
| MeasureInstru     | -0.3                                                     | -147.9                                                 | 10.3                                      | 7.1                                            | 0.8                                              | 38.2                                    | -91.7                          |
| ArtworkOthers     | 12.2                                                     | 0.9                                                    | 23.1                                      | 20.0                                           | 1.9                                              | 88.4                                    | 146.6                          |
| ElectricHeatpower | 5.3                                                      | -47.0                                                  | 10.3                                      | 0.5                                            | 1.2                                              | 65.0                                    | 35.3                           |
| GasSupply         | 7.4                                                      | -68.1                                                  | 33.3                                      | 27.3                                           | -6.9                                             | 71.1                                    | 64.1                           |
| WaterSupply       | 1.2                                                      | -75.2                                                  | -45.8                                     | 29.1                                           | -2.6                                             | 48.0                                    | -45.3                          |
| <b>Total</b>      | 4.3                                                      | -51.5                                                  | 10.6                                      | 3.2                                            | 2.5                                              | 64.7                                    | 33.8                           |

## 6. Sensitivity analysis

**Methodology.** Uncertainties of SDA method mainly come from the choice of base year, decomposition method, decomposition model, respectively, as well as the aggregation level of the data<sup>9</sup>. Due to the lack of necessary data, we conduct a sensitivity analysis of the sectors' aggregation as previous studies<sup>10</sup>. The input output tables used in our paper totally have 26 sectors. All data used in SDA model are aggregated to 10 sectors, 6 sectors and 3 sectors respectively. Then we decompose four main pollutants emission change during 11th FYP period by using different data sets to test if the decomposition results will change a lot due to sector's aggregation. As presented in Fig S4, sector's aggregation have little impact on the results for most driving factors except pollutant generation intensity, presenting more pollution reduction when sectors are aggregated from 10 sectors to 6 sectors for SO<sub>2</sub> and NO<sub>x</sub>. Overall, sector's aggregation may have a little influence on our results, but will not affect our conclusion presented above.

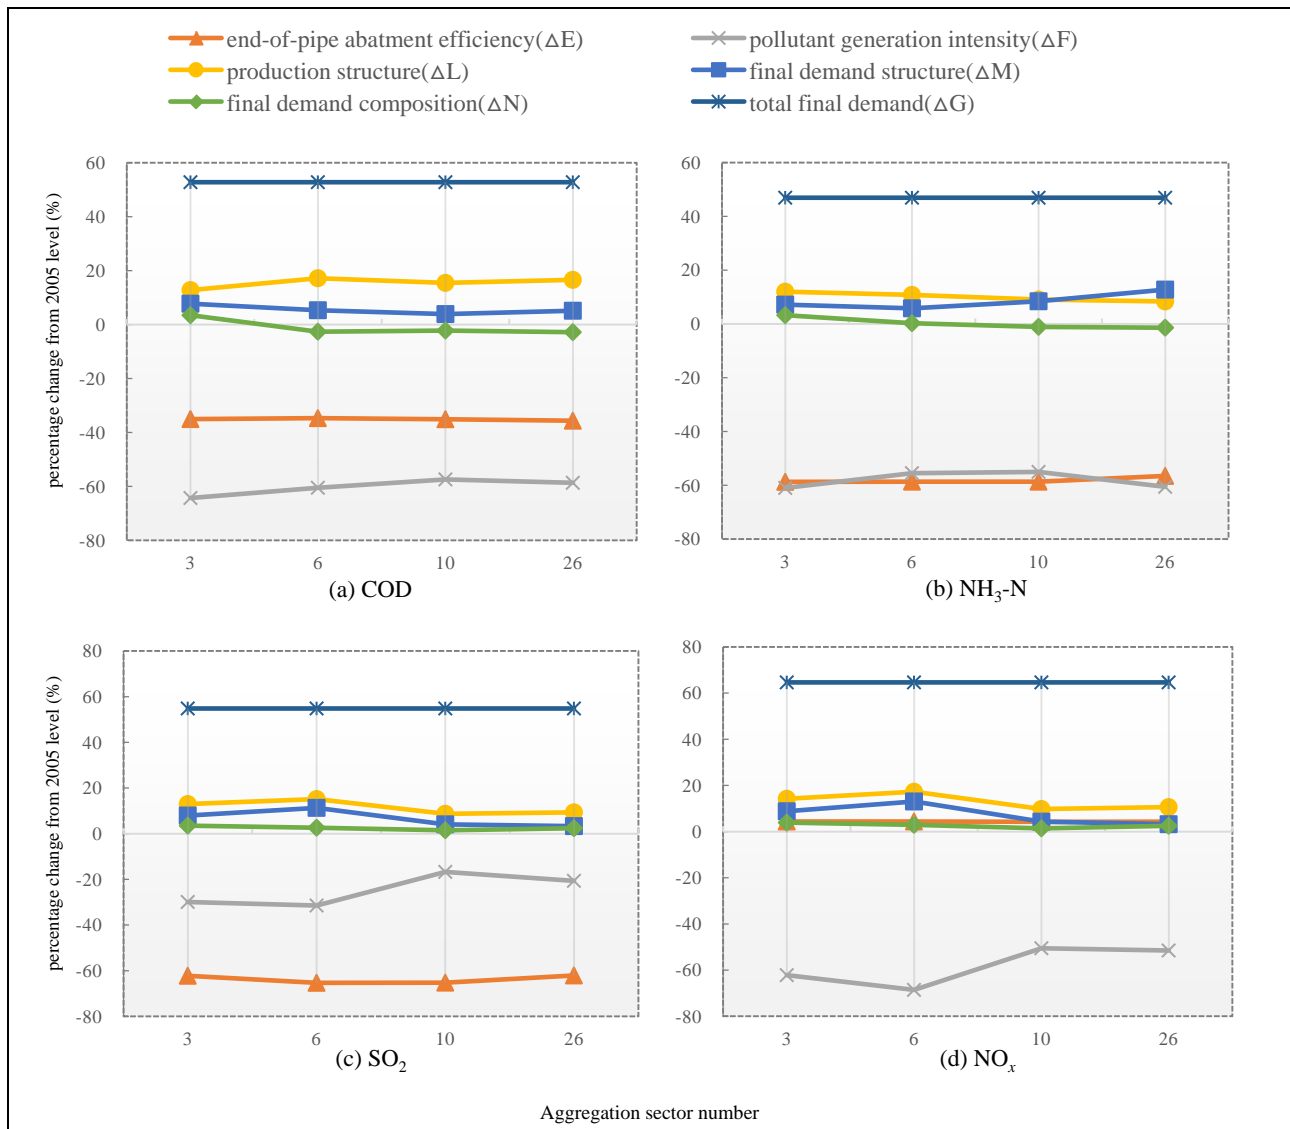

**Figure S4** Sensitivity analysis results of SDA decomposition with different aggregation sector levels

**Data.** Uncertainties of data mainly come from emission and generation of four pollutants. These data in year of 2005 and 2010 totally come from *Annual Statistic Report on Environment in China*, released by MEP. It must be admitted that some certain errors will exist in this process of data collection and estimation, especially, data of pollution emission and generation may possibly be “underestimated” on purpose by industrial enterprises and local governments owing to evade assessment and punishment from central government and MEP as we discussed in manuscript. So, to analyze the influence of these “underestimated” on our results and conclusion, a sensitivity analysis is conducted—increasing emissions of each sector in year of 2005 and 2010 with 5%, 10% and 20% respectively with other factors keeping constant. As presented in Table S16, when sector’s emissions in year of 2005 and 2010 increased with 5%, 10% and 20% with other factors keeping constant, we find that the contributions of all six determinants for changes of pollutants emissions increase gradually with increase of pollutants emission at the same time. Also, we will get the same results when we increase the generation of four pollutants instead of emissions. Fortunately, uncertainties of pollution data may affect our structural decomposition results in 11th FYP, however, will not significantly affect our conclusions according to results of sensitivity analysis.

**Table S16 Sensitivity analysis results of SDA decomposition when original emission value of four pollutants increased by 5%, 10% and 20% respectively during 11th FYP.**

| pollutants         | Increment           | end-of-pipe<br>abatement<br>efficiency<br>( $\Delta E$ ) | pollutant<br>generation<br>intensity<br>( $\Delta F$ ) | production<br>structure<br>( $\Delta L$ ) | final demand<br>structure<br>( $\Delta M$ ) | final demand<br>composition<br>( $\Delta N$ ) | total final<br>demand<br>( $\Delta G$ ) | total change<br>( $\Delta Q$ ) |
|--------------------|---------------------|----------------------------------------------------------|--------------------------------------------------------|-------------------------------------------|---------------------------------------------|-----------------------------------------------|-----------------------------------------|--------------------------------|
| COD                | Original Value (OV) | -35.62                                                   | -58.64                                                 | 16.57                                     | 5.12                                        | -2.81                                         | 52.77                                   | -22.60                         |
|                    | OV $\times$ (1+5%)  | -37.40                                                   | -61.57                                                 | 17.40                                     | 5.38                                        | -2.95                                         | 55.41                                   | -23.73                         |
|                    | OV $\times$ (1+10%) | -39.18                                                   | -64.50                                                 | 18.23                                     | 5.63                                        | -3.09                                         | 58.05                                   | -24.86                         |
|                    | OV $\times$ (1+20%) | -42.75                                                   | -70.36                                                 | 19.89                                     | 6.15                                        | -3.37                                         | 63.32                                   | -27.12                         |
| NH <sub>3</sub> -N | Original Value (OV) | -56.51                                                   | -60.54                                                 | 8.40                                      | 12.78                                       | -1.39                                         | 46.93                                   | -50.33                         |
|                    | OV $\times$ (1+5%)  | -59.34                                                   | -63.56                                                 | 8.82                                      | 13.42                                       | -1.46                                         | 49.27                                   | -52.85                         |
|                    | OV $\times$ (1+10%) | -62.16                                                   | -66.59                                                 | 9.25                                      | 14.06                                       | -1.52                                         | 51.62                                   | -55.36                         |
|                    | OV $\times$ (1+20%) | -67.81                                                   | -72.65                                                 | 10.09                                     | 15.33                                       | -1.66                                         | 56.31                                   | -60.39                         |
| SO <sub>2</sub>    | Original Value (OV) | -62.08                                                   | -20.63                                                 | 9.32                                      | 3.31                                        | 2.38                                          | 54.82                                   | -12.87                         |
|                    | OV $\times$ (1+5%)  | -65.18                                                   | -21.66                                                 | 9.79                                      | 3.47                                        | 2.50                                          | 57.56                                   | -13.51                         |
|                    | OV $\times$ (1+10%) | -68.28                                                   | -22.69                                                 | 10.26                                     | 3.64                                        | 2.62                                          | 60.31                                   | -14.15                         |
|                    | OV $\times$ (1+20%) | -74.49                                                   | -24.75                                                 | 11.19                                     | 3.97                                        | 2.85                                          | 65.79                                   | -15.44                         |
| NO <sub>x</sub>    | Original Value (OV) | 4.32                                                     | -51.53                                                 | 10.65                                     | 3.23                                        | 2.48                                          | 64.66                                   | 33.81                          |
|                    | OV $\times$ (1+5%)  | 4.53                                                     | -54.10                                                 | 11.18                                     | 3.39                                        | 2.61                                          | 67.90                                   | 35.50                          |
|                    | OV $\times$ (1+10%) | 4.75                                                     | -56.68                                                 | 11.71                                     | 3.55                                        | 2.73                                          | 71.13                                   | 37.19                          |
|                    | OV $\times$ (1+20%) | 5.18                                                     | -61.83                                                 | 12.77                                     | 3.88                                        | 2.98                                          | 77.60                                   | 40.57                          |

## References:

1. Ministry of Environmental Protection (MEP), *Annual Statistic Report on Environment in China 2010*. China Environmental Science Press: Beijing, 2010; in Chinese.
2. National Bureau of Statistics (NBS), *China Statistical Yearbook 2011*. China Statistics Press: Beijing, 2011; in

Chinese.

3. China Nonferrous Metals Industry Association, *The Yearbook of Nonferrous Metals Industry of China 2007*. China Nonferrous Metals Industry Yearbook Editorial Board: Beijing, 2008; in Chinese.
4. ICAN data research center. *China leather market forecast report 2009*; China leather market forecast report 2009: Beijing, 2009; in Chinese.
5. State Council. The Energy Conservation and Emission Reduction 12th Five-Year Plan, 2012; [http://www.gov.cn/-gongbao/content/2012/content\\_2217291.htm](http://www.gov.cn/-gongbao/content/2012/content_2217291.htm) (accessed Feb 4, 2013) in Chinese.
6. State Council. Twelfth five-year plan for national economic and social development. <http://news.xinhuanet.com>. *Xinhua News* 2011; in Chinese.
7. National Bureau of Statistics (NBS), *China Statistical Yearbook 2011*. China Statistics Press: Beijing, 2011; in Chinese.
8. Ministry of Environmental Protection (MEP), *Annual Statistic Report on Environment in China 2013*. China Environmental Science Press: Beijing, 2013; in Chinese.
9. Dietzenbacher, E.; Los, B., Structural decomposition techniques: sense and sensitivity. *Econ. Syst. Res.* **1998**, *10*, (4), 307-324.
10. Weber, C. L., Measuring structural change and energy use: Decomposition of the US economy from 1997 to 2002. *Energy Policy*. **2009**, *37*, (4), 1561-1570.
